# Supplementary material for: Ion-Pair Interaction and Hydrogen Bonds as Main Features of Protein Thermostability in Mutated T1 Recombinant Lipase Originating from Geobacillus zalihae
Source: MDPI journal article supplement (doi:10.3390/molecules25153430), 2020-07-28
Supplement: s1 [file s1]

Type of the Paper (Article, Review, Communication, etc.)

# Ion interaction and hydrogen bonds as main features of protein thermostability in mutated T1 recombinant lipase originated from *Geobacillus zalihae*

Siti Nor Hasmah Ishak<sup>1,2</sup>, Nor Hafizah Ahmad Kamarudin<sup>1,3</sup>, Mohd Shukuri Mohamad Ali<sup>1,4</sup>, Adam Thean Chor Leow<sup>1,5,6</sup>, and Raja Noor Zaliha Raja Abd. Rahman<sup>1,2,6,7,\*</sup>

<sup>1</sup> Enzyme and Microbial Technology Research Centre, Faculty of Biotechnology and Biomolecular Sciences, Universiti Putra Malaysia, 43400 UPM Serdang, Selangor, Malaysia; [snhasmahishak@gmail.com](mailto:snhasmahishak@gmail.com); hafizah\_kamar@upm.edu.my (N.H.A.K.); adamleow@upm.edu.my (T.C.L.); mshukuri@upm.edu.my (M.S.M.A.).

<sup>2</sup> Department of Microbiology, Faculty of Biotechnology and Biomolecular Sciences, Universiti Putra Malaysia, 43400 UPM Serdang, Selangor, Malaysia.

<sup>3</sup> Centre of Foundation Studies for Agricultural Science, Universiti Putra Malaysia, 43400 UPM Serdang, Selangor, Malaysia

<sup>4</sup> Department of Biochemistry, Faculty of Biotechnology and Biomolecular Sciences, Universiti Putra Malaysia, 43400 UPM Serdang, Selangor, Malaysia.

<sup>5</sup> Department of Cell and Molecular Biology, Faculty of Biotechnology and Biomolecular Sciences, Universiti Putra Malaysia, 43400 UPM Serdang, Selangor, Malaysia.

<sup>6</sup> Institute of Bioscience, Universiti Putra Malaysia, 43400 UPM Serdang, Selangor, Malaysia.

<sup>7</sup> Laboratory of Halal Science Research, Halal Products Research Institute, Universiti Putra Malaysia, 43400 UPM Serdang, Selangor, Malaysia

\* Correspondence: [mzaliha@upm.edu.my](mailto:mzaliha@upm.edu.my)

Received: date; Accepted: date; Published: date

D43E  
wt-HT1  
GGCGTGC GCGCGATATCGAACATGGCTGAACGAGACGGTTATCGAACGTATACGCTG  
GGCGTGC GCGCGATATCGAACATGGCTGAACGAGACGGTTATCGAACGTATACGCTG  
\*\*\*\*\*

D43E  
wt-HT1  
GCGGTCGGACCGCTCTCGAGCAACTGGGACCGGGCGTGTGAAGCGTATGCTCAGCTTGTG  
GCGGTCGGACCGCTCTCGAGCAACTGGGACCGGGCGTGTGAAGCGTATGCTCAGCTTGTG  
\*\*\*\*\*

(a)

T118N  
wt-HT1  
CAGCCAAGGGGGCAGAACGCCCGCATGCTTGTCTCGCTCCTAGAGAACGGAAGCCAAGA  
CAGCCAAGGGGGCAGAACGCCCGCATGCTTGTCTCGCTCCTAGAGAACGGAAGCCAAGA  
\*\*\*\*\*

T118N  
wt-HT1  
AGAGCGGGAGTACGCCAAGGCGCATAACGTGTGCTTGTACCGTTGTTTGAAGGTGGACA  
AGAGCGGGAGTACGCCAAGGCGCATAACGTGTGCTTGTACCGTTGTTTGAAGGTGGACA  
\*\*\*\*\*

(b)

E226D  
wt-HT1  
CAATGGGGACTGCGCCGCCAGCCGGGTGAATCGTTCGACCATTATTTGATCGGCTCAAG  
CAATGGGGACTGCGCCGCCAGCCGGGTGAATCGTTCGACCATTATTTGAAACGGCTCAAG  
\*\*\*\*\*

E226D  
wt-HT1  
CGCTCCCTGTGTTGGACGTCCACAGATACCGCCCGCTACGATTTATCCGTTTCCGGAGCT  
CGCTCCCTGTGTTGGACGTCCACAGATACCGCCCGCTACGATTTATCCGTTTCCGGAGCT  
\*\*\*\*\*

(c)

```

E250L      TCCACAGATACCGCCCGCTACGATTATCCGTTTCCGGAGCTTTGAAGTTGAATCAATGG
wt-HT1     TCCACAGATACCGCCCGCTACGATTATCCGTTTCCGGAGCTGAGAAGTTGAATCAATGG
*****
E250L      GTGCAAGCAAGCCCGAATACGTATTATTTGAGTTTCTCTACAGAACGGACGTATCGCGGA
wt-HT1     GTGCAAGCAAGCCCGAATACGTATTATTTGAGTTTCTCTACAGAACGGACGTATCGCGGA
*****

```

(d)

```

N304E      CGCGGTCGTATGCGCTCCGTTTCTCGGTTTCGTACCGGAGCCGACGCTCGGCATTGACGA
wt-HT1     CGCGGTCGTATGCGCTCCGTTTCTCGGTTTCGTACCGCAATCCGACGCTCGGCATTGACGA
*****
N304E      CCGATGGTTGGAGAACGATGGCATTGTCAATACGGTTTCCATGAACGGTCCAAGCGTGG
wt-HT1     CCGATGGTTGGAGAACGATGGCATTGTCAATACGGTTTCCATGAACGGTCCAAGCGTGG
*****

```

(e)

**Figure S1.** Partial sequence alignments of mutants D43E, T118N, E226D, E250L and N304E with wild-type HT1 sequence. (a) Asp (GAC) to Glu (GAG). (b) Thr (ACG) to Asn (AAC). (c) Glu (GAA) to Asp (GAT). (d) Glu (GAG) to Leu (TTG). (e) Asn (AAT) to Glu (GAG). The multiple sequences alignment was generated from <https://www.ebi.ac.uk/Tools/msa/clustalo/>. The mutated sequences are marked in red boxes.

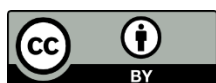

© 2020 by the authors. Submitted for possible open access publication under the terms and conditions of the Creative Commons Attribution (CC BY) license (<http://creativecommons.org/licenses/by/4.0/>).
